# Supplementary material for: DNA Methylation and Detoxification in the Earthworm Lumbricus terrestris Exposed to Cadmium and the DNA Demethylation Agent 5-aza-2′-deoxycytidine
Source: MDPI journal article supplement (doi:10.3390/toxics10020100), 2022-02-21
Supplement: s1 [file s1]

# Supplementary material: DNA methylation and detoxification in the earthworm *Lumbricus terrestris* exposed to cadmium and the DNA demethylation agent 5-aza-2'-deoxycytidine

Gerhard P. Aigner, Pamela Nenning, Birgit Fiechtner, Maja Šrut, Martina Höckner

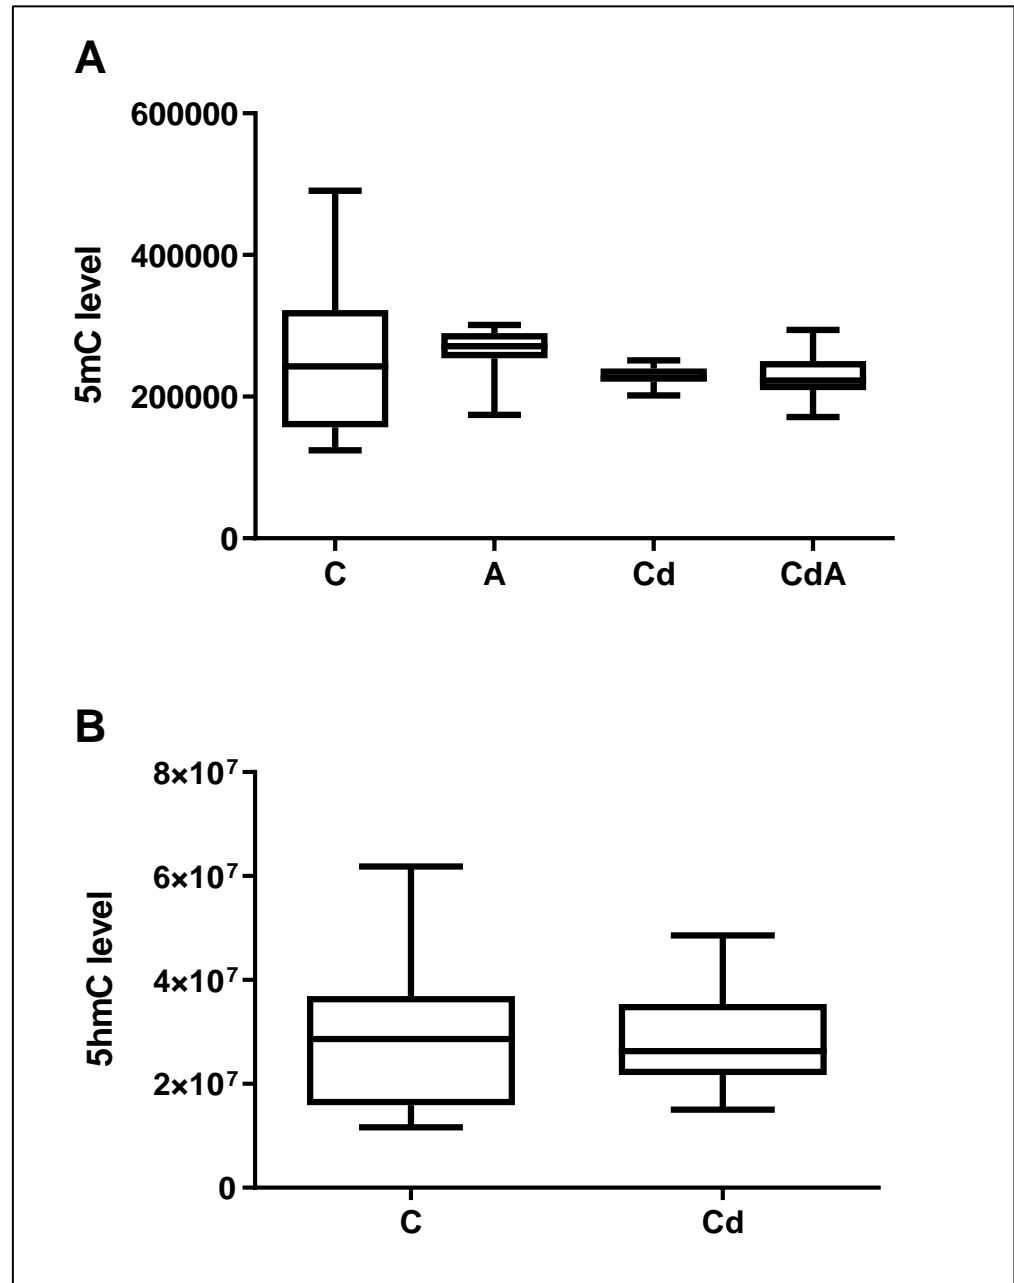

**Figure S1.** Global DNA methylation levels in tissue from control (C,  $n = 6$ ) and exposed *L. terrestris* individuals (5-aza-2'-deoxycytidine (A),  $n = 7$ ; 200 mg/kg Cd (Cd),  $n = 7$ ; 5-aza-2'-deoxycytidine and 200 mg/kg Cd (CdA),  $n = 13$ ) after 48 h of exposure (A). Global levels of hydroxymethylcytosine in coelomocytes extruded from control (C,  $n = 10$ ) and Cd-exposed *L. terrestris* individuals (200 mg/kg Cd (Cd),  $n = 10$ ) after 48 h of exposure (B).
